# Supplementary material for: Tin(iv) phosphonates: porous nanoparticles and pillared materials
Source: Royal Society of Chemistry journal article supplement (doi:10.1039/b818618a), 2009-01-01
Supplement: b818618a.pdf [file b818618a.pdf]

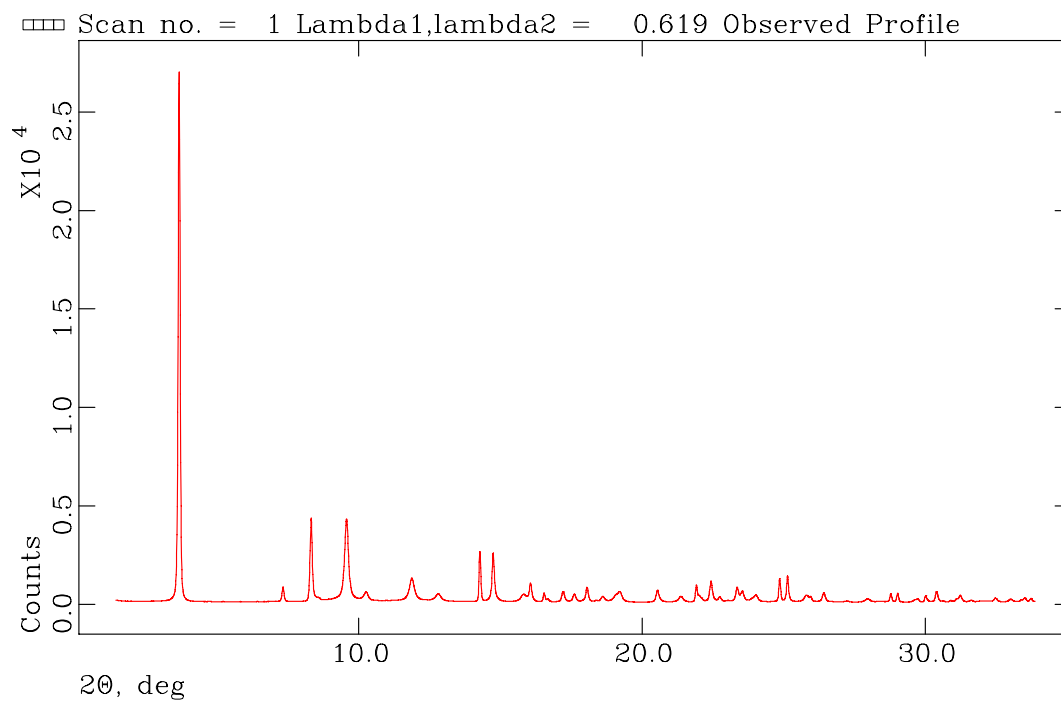

Fig. S1: Synchrotron powder diffraction pattern obtained at the Advanced Photon Source, Argonne National Laboratory ( $\lambda = 0.61936\text{\AA}$ ).

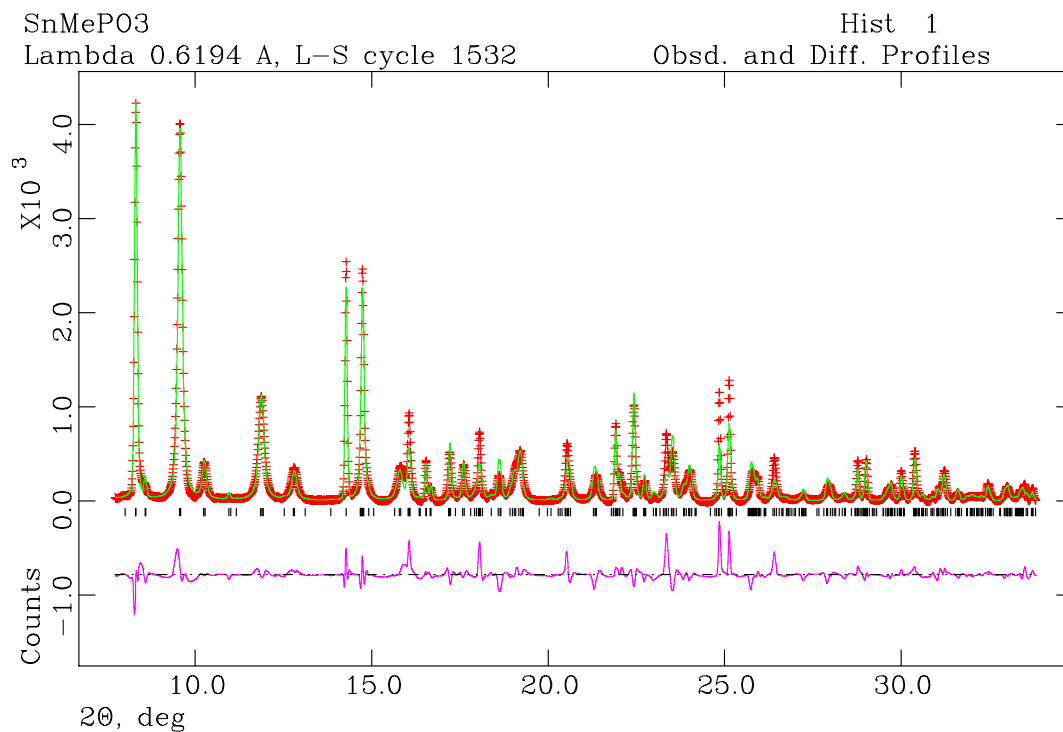

Fig. S2: Observed (+) and calculated (solid line) and difference profiles for the Rietveld refinement of Sn(O<sub>3</sub>PCH<sub>3</sub>)<sub>2</sub>.

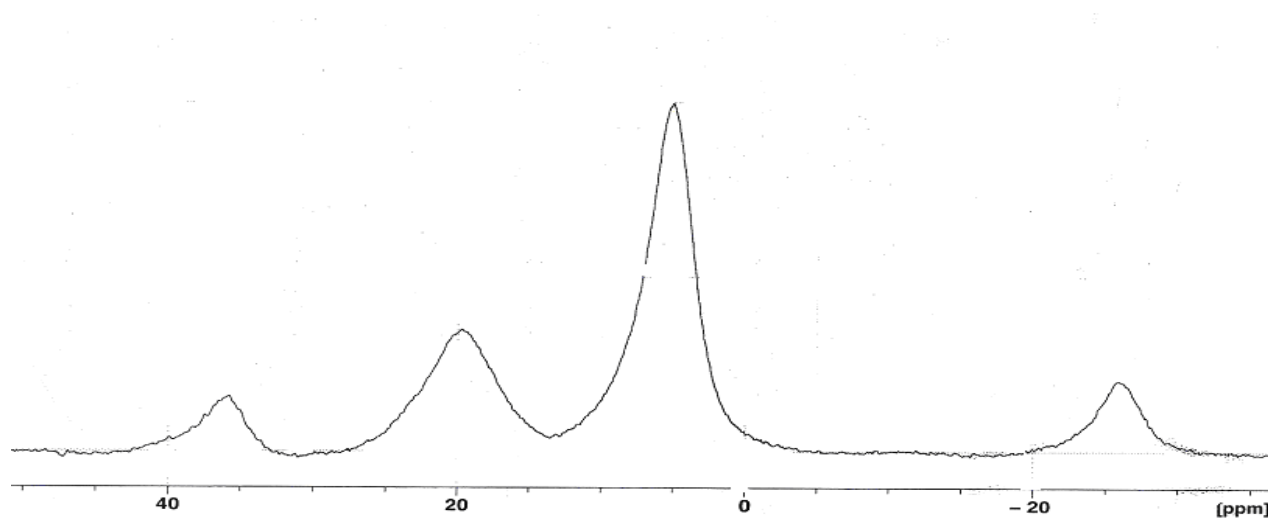

Fig. S3.  $^{31}\text{P}$  MAS NMR spectrum for the mixed derivative  $\text{Sn}(\text{O}_3\text{PC}_{12}\text{H}_8\text{PO}_3)_{0.65}(\text{O}_3\text{PC}_{12}\text{H}_8\text{PO}_3\text{H}_2)_{0.2}(\text{O}_3\text{PCH}_3)_{0.5} \cdot 0.43\text{DMSO}$ . The methyl phosphorous is at 20ppm and the biphenyl  $^{31}\text{P}$  at 5ppm.
